# Supplementary material for: Unraveling the Relationship between Milk Yield and Quality at the Test Day with Rumination Time Recorded by a PLF Technology
Source: MDPI journal article supplement (doi:10.3390/ani11061583), 2021-05-28
Supplement: s1 [file s1]

**Table S2.** SD of RT<sub>D</sub> in the three farms

| Variable                    | Farm   | Mean  | SD      | 1 <sup>st</sup><br>quartile | Median | 3 <sup>rd</sup><br>quartile |
|-----------------------------|--------|-------|---------|-----------------------------|--------|-----------------------------|
| SD RT <sub>3</sub> (min/d)  | Farm-1 | 37.74 | ± 24.12 | 21.73                       | 32.70  | 47.08                       |
|                             | Farm-2 | 30.36 | ± 18.36 | 17.21                       | 28.14  | 39.69                       |
|                             | Farm-3 | 34.10 | ± 23.17 | 18.57                       | 29.17  | 44.21                       |
| SD RT <sub>7</sub> (min/d)  | Farm-1 | 49.87 | ± 24.25 | 33.53                       | 44.16  | 59.66                       |
|                             | Farm-2 | 39.36 | ± 21.04 | 27.25                       | 36.01  | 44.84                       |
|                             | Farm-3 | 46.18 | ± 25.58 | 29.76                       | 40.14  | 54.68                       |
| SD RT <sub>10</sub> (min/d) | Farm-1 | 54.88 | ± 25.39 | 37.92                       | 49.16  | 65.53                       |
|                             | Farm-2 | 41.41 | ± 20.02 | 29.82                       | 36.95  | 46.70                       |
|                             | Farm-3 | 50.06 | ± 26.78 | 32.72                       | 43.34  | 58.39                       |

RT<sub>3</sub>, RT<sub>7</sub>, RT<sub>10</sub>, are the three average rumination time in min/d calculated at the periods of 3, 7 and 10 days preceding the test day
