# Supplementary material for: Unraveling the Relationship between Milk Yield and Quality at the Test Day with Rumination Time Recorded by a PLF Technology
Source: Animals (Basel). 2021 May 28;11(6):1583. doi: 10.3390/ani11061583 (PMC8228303; doi:10.3390/ani11061583)
Supplement: Supplementary file 1 [file animals-11-01583-s001.zip › supplementary table S1.xlsx]

## Sheet: farm1
Variable:	DIM (at the TD)
	mean	sd	0.25	0.5	0.75	n
2016-11-21	145.074	106.673	75	105	213.5	27
2016-12-23	117	84.6046	65.5	102.5	138	30
2017-02-03	123.205	98.7448	39	107	162	39
2017-03-10	110.111	96.507	50	71	144	45
2017-04-06	114.177	80.1231	45.75	98	163.75	96
2017-05-11	133.529	84.5241	67	120	177	85
2017-06-12	132.343	87.3606	76	123	178	73
2017-07-13	133.803	95.5408	60.5	122	183.5	71
2017-08-29	131.352	105.351	42.75	110	187	88
2017-09-29	121.704	88.1236	47	106	187.25	98
2017-11-07	123.651	90.9899	53	93.5	170.75	106
Variable:	RT3 (min/d)
	mean	sd	0.25	0.5	0.75	n
2016-11-21	461.629	55.7691	417.5	462.67	507.835	27
2016-12-23	472.656	70.3824	437.668	488.665	515.997	30
2017-02-03	510.64	70.5544	445	527	566.17	39
2017-03-10	492.111	79.593	471.33	506.67	540.33	45
2017-04-06	500.965	72.2081	464.085	504.165	538.918	96
2017-05-11	487.353	68.2804	442.33	491	535.33	85
2017-06-12	478.818	99.2094	435.33	492.33	541.67	73
2017-07-13	437.225	79.6801	386.835	437.33	489.165	71
2017-08-29	468.023	82.9565	418.83	473.83	513.92	88
2017-09-29	482.024	93.1087	448.998	502.835	546.747	98
2017-11-07	500.163	72.6589	455.498	508.33	543.67	106
Variable:	RT7 (min/d)
	mean	sd	0.25	0.5	0.75	n
2016-11-21	475.618	50.0022	444.57	478.57	512.57	27
2016-12-23	475.029	68.8158	437.178	465	519.428	30
2017-02-03	502.122	60.6802	457.43	490.29	540.93	39
2017-03-10	496.432	85.3508	462.57	513.71	547.43	45
2017-04-06	506.097	65.1036	472.325	508.71	548.105	96
2017-05-11	486.643	61.6003	455.14	491.43	526	85
2017-06-12	493.468	92.8008	469.14	501.86	545.57	73
2017-07-13	430.551	79.5843	376.57	420.71	480.36	71
2017-08-29	477.185	68.9671	433.82	476.93	525.467	88
2017-09-29	494.86	87.6653	471.322	505.43	551.217	98
2017-11-07	509.477	67.0106	471.288	515.645	547.428	106
Variable:	RT10 (min/d)
	mean	sd	0.25	0.5	0.75	n
2016-11-21	476.418	55.2222	442.95	482	513.85	27
2016-12-23	482.177	64.9451	449.125	473.95	519.925	30
2017-02-03	497.554	59.0645	451.1	494.3	538.75	39
2017-03-10	492.304	85.2425	460.2	514.8	551	45
2017-04-06	498.567	61.8017	461.125	507.3	538.35	96
2017-05-11	494.82	58.9877	462	502.4	531.4	85
2017-06-12	492.529	93.0909	464.9	507	544.2	73
2017-07-13	439.069	79.9229	390.4	436.1	490.05	71
2017-08-29	485.329	65.0778	440.725	489.4	529.725	88
2017-09-29	493.981	83.1553	466.85	506.8	555.275	98
2017-11-07	509.177	68.6379	471.9	513.05	549.35	106
Variable:	Milk yield (kg/d)
	mean	sd	0.25	0.5	0.75	n
2016-11-21	30.5	8.93472	28.3	32.4	36.7	27
2016-12-23	34.01	8.02871	30.25	34.4	38.05	30
2017-02-03	35.8051	8.14923	29.5	37.1	41.9	39
2017-03-10	35.5644	9.36638	28.4	34.4	44	45
2017-04-06	35.9292	7.56353	30.2	35.3	40.5	96
2017-05-11	33.9729	7.76899	27.6	34.6	38.9	85
2017-06-12	35.1507	6.71657	30.9	35	40.2	73
2017-07-13	35.731	8.3647	30.5	35.5	40.45	71
2017-08-29	32.2625	7.36784	27.75	30.9	36.625	88
2017-09-29	35.1388	7.86793	29.875	35.2	39.3	98
2017-11-07	34.166	7.43374	30.3	33.4	38.675	106
Variable:	Protein (kg/d)
	mean	sd	0.25	0.5	0.75	n
2016-11-21	1.07569	0.300104	0.90897	1.1523	1.28817	27
2016-12-23	1.16078	0.264076	0.987637	1.18782	1.36553	30
2017-02-03	1.22583	0.212435	1.11804	1.2352	1.36286	39
2017-03-10	1.16557	0.258225	0.93925	1.15666	1.41728	45
2017-04-06	1.23907	0.238891	1.08825	1.23338	1.39359	96
2017-05-11	1.13196	0.244212	0.97632	1.11904	1.3144	85
2017-06-12	1.14252	0.24358	0.97002	1.14665	1.30356	73
2017-07-13	1.11338	0.262806	0.966765	1.13668	1.26831	71
2017-08-29	1.08766	0.211557	0.949237	1.06878	1.2179	88
2017-09-29	1.1813	0.244659	1.0266	1.223	1.33933	98
2017-11-07	1.21764	0.241174	1.05427	1.24416	1.36987	106
Variable:	Casein (kg/d)
	mean	sd	0.25	0.5	0.75	n
2016-11-21	0.826661	0.237539	0.69517	0.87185	0.99405	27
2016-12-23	0.922122	0.214426	0.796185	0.94087	1.0881	30
2017-02-03	0.916851	0.158892	0.83069	0.9218	1.02883	39
2017-03-10	0.925436	0.208644	0.76024	0.9153	1.1178	45
2017-04-06	0.94658	0.186316	0.823582	0.941155	1.08192	96
2017-05-11	0.890999	0.193304	0.7776	0.88501	1.03032	85
2017-06-12	0.884746	0.1921	0.74148	0.89105	1.02666	73
2017-07-13	0.87169	0.20573	0.760815	0.88621	0.99557	71
2017-08-29	0.816056	0.162209	0.71592	0.80866	0.916157	88
2017-09-29	0.927492	0.192589	0.803022	0.95157	1.05686	98
2017-11-07	0.929978	0.187029	0.812092	0.95563	1.05886	106
Variable:	Fat (kg/d)
	mean	sd	0.25	0.5	0.75	n
2016-11-21	1.25141	0.421296	1.04506	1.35468	1.5206	27
2016-12-23	1.26936	0.323293	1.12126	1.26737	1.40962	30
2017-02-03	1.41757	0.299719	1.22642	1.407	1.58573	39
2017-03-10	1.30488	0.320704	1.02102	1.30196	1.53792	45
2017-04-06	1.38395	0.308883	1.14734	1.36915	1.5848	96
2017-05-11	1.26139	0.299688	1.04542	1.22696	1.45971	85
2017-06-12	1.24914	0.31562	1.05602	1.23066	1.47804	73
2017-07-13	1.23141	0.334598	1.06822	1.23488	1.41149	71
2017-08-29	1.3204	0.304297	1.10234	1.29717	1.54847	88
2017-09-29	1.26435	0.305023	1.08303	1.30045	1.45818	98
2017-11-07	1.41763	0.290804	1.21929	1.39672	1.59833	106
Variable:	Lactose (kg/d)
	mean	sd	0.25	0.5	0.75	n
2016-11-21	1.4922	0.461205	1.42115	1.61463	1.79032	27
2016-12-23	1.65262	0.408899	1.49245	1.68937	1.91456	30
2017-02-03	1.77232	0.422224	1.49688	1.79	2.1053	39
2017-03-10	1.74458	0.483	1.40743	1.61703	2.2308	45
2017-04-06	1.79478	0.385408	1.5122	1.76475	2.02592	96
2017-05-11	1.69819	0.394446	1.36816	1.70796	1.9737	85
2017-06-12	1.73901	0.401409	1.51805	1.78022	1.99584	73
2017-07-13	1.74724	0.455255	1.52101	1.735	2.00246	71
2017-08-29	1.5808	0.375414	1.38623	1.52646	1.81269	88
2017-09-29	1.71646	0.395937	1.48157	1.70625	1.93288	98
2017-11-07	1.69633	0.378285	1.48151	1.68283	1.9289	106
Variable:	Protein (%)
	mean	sd	0.25	0.5	0.75	n
2016-11-21	3.5737	0.37427	3.3	3.55	3.845	27
2016-12-23	3.442	0.388369	3.1775	3.38	3.725	30
2017-02-03	3.49103	0.426774	3.2	3.34	3.81	39
2017-03-10	3.33556	0.381817	3.12	3.27	3.46	45
2017-04-06	3.47344	0.329423	3.2375	3.43	3.6325	96
2017-05-11	3.35824	0.351819	3.15	3.3	3.55	85
2017-06-12	3.26671	0.502403	3.06	3.28	3.47	73
2017-07-13	3.12268	0.500659	2.925	3.13	3.38	71
2017-08-29	3.41477	0.397535	3.14	3.345	3.6125	88
2017-09-29	3.39102	0.350935	3.12	3.355	3.5875	98
2017-11-07	3.59528	0.391048	3.3225	3.495	3.7975	106
Variable:	Casein (%)
	mean	sd	0.25	0.5	0.75	n
2016-11-21	2.74296	0.346497	2.46	2.77	2.935	27
2016-12-23	2.731	0.319335	2.4875	2.725	2.9425	30
2017-02-03	2.6141	0.344725	2.35	2.51	2.875	39
2017-03-10	2.64889	0.328054	2.4	2.62	2.77	45
2017-04-06	2.65271	0.272846	2.45	2.615	2.805	96
2017-05-11	2.64353	0.288443	2.47	2.58	2.74	85
2017-06-12	2.52822	0.396892	2.37	2.53	2.68	73
2017-07-13	2.44591	0.403469	2.255	2.42	2.65	71
2017-08-29	2.55989	0.30404	2.3375	2.52	2.7225	88
2017-09-29	2.66378	0.295584	2.47	2.635	2.865	98
2017-11-07	2.74604	0.321993	2.5325	2.67	2.9125	106
Variable:	Fat (%)
	mean	sd	0.25	0.5	0.75	n
2016-11-21	4.07	0.805419	3.605	4.04	4.625	27
2016-12-23	3.773	0.67833	3.23	3.545	4.405	30
2017-02-03	4.02923	0.665489	3.565	4.02	4.505	39
2017-03-10	3.76311	0.805145	3.24	3.56	4.26	45
2017-04-06	3.8874	0.634934	3.5075	3.825	4.1725	96
2017-05-11	3.75106	0.566327	3.35	3.75	4.07	85
2017-06-12	3.57082	0.724495	3.18	3.42	4.05	73
2017-07-13	3.47662	0.877141	3.075	3.51	3.95	71
2017-08-29	4.15454	0.805517	3.6375	4.025	4.455	88
2017-09-29	3.63857	0.757896	3.18	3.64	4.215	98
2017-11-07	4.22387	0.720583	3.7225	4.145	4.705	106
Variable:	Lactose (%)
	mean	sd	0.25	0.5	0.75	n
2016-11-21	4.85037	0.313853	4.795	4.9	5.02	27
2016-12-23	4.85067	0.204399	4.755	4.86	4.9725	30
2017-02-03	4.94128	0.202513	4.82	5	5.08	39
2017-03-10	4.88933	0.229806	4.8	4.94	5.04	45
2017-04-06	4.99125	0.18838	4.89	5.015	5.12	96
2017-05-11	4.99553	0.186027	4.9	5.02	5.1	85
2017-06-12	4.93164	0.609029	4.92	5.02	5.13	73
2017-07-13	4.85437	0.604331	4.82	4.94	5.02	71
2017-08-29	4.89034	0.199508	4.79	4.92	5.02	88
2017-09-29	4.8802	0.176121	4.8025	4.905	5.0075	98
2017-11-07	4.95943	0.210074	4.83	4.985	5.0975	106

## Sheet: farm2
Variable:	DIM (at the TD)
	mean	sd	0.25	0.5	0.75	n
2016-11-16	236.45	154.427	115.25	261	317.25	20
2017-02-07	230.294	151.414	81	219	387	17
2017-03-07	190.263	126.937	93	169	262	57
2017-04-05	172.898	119.157	80.5	149	249.5	59
2017-05-04	195.086	120.495	95.75	171	263.5	58
2017-05-31	207.596	123.201	109	184	282	57
2017-06-30	196.25	111.48	117.75	185	248.25	52
2017-07-31	199.745	113.715	134.5	189	257.5	51
2017-09-19	203.28	118.371	125.5	208	270.25	50
2017-10-17	189.553	108.056	105.5	216	263.5	47
2017-11-17	189.178	114.992	80	188	269	45
Variable:	RT3 (min/d)
	mean	sd	0.25	0.5	0.75	n
2016-11-16	594.116	95.0485	573.168	602	643.668	20
2017-02-07	584.195	56.2469	538.67	584.33	624	17
2017-03-07	626.25	63.1979	588	619.33	664.33	57
2017-04-05	625.237	53.618	588	619.33	663	59
2017-05-04	624.65	58.7539	585.835	639.17	669	58
2017-05-31	586.298	57.8396	553.33	582.67	619.67	57
2017-06-30	629.167	62.6716	588.08	640	665.753	52
2017-07-31	624.921	54.2386	594.5	627.33	667	51
2017-09-19	635.634	75.9724	606.08	646.165	676.75	50
2017-10-17	606.426	70.8596	573.67	608.33	644.5	47
2017-11-17	613.014	67.2803	580.67	610.33	651.33	45
Variable:	RT7 (min/d)
	mean	sd	0.25	0.5	0.75	n
2016-11-16	596.307	68.9583	570.96	595.075	641.467	20
2017-02-07	593.218	63.0149	576.71	602.14	620.14	17
2017-03-07	631.013	63.09	583.29	632.43	661.86	57
2017-04-05	626.173	51.8275	582.075	618.43	656.285	59
2017-05-04	628.352	57.4784	589.538	640.71	666.462	58
2017-05-31	595.206	55.5444	562.14	600.86	634.43	57
2017-06-30	617.069	65.1034	586.64	627.43	656.57	52
2017-07-31	634.199	53.4426	606.715	639	670.07	51
2017-09-19	624.611	58.059	588.928	626	662.753	50
2017-10-17	599.784	71.2518	576.645	606.29	643.57	47
2017-11-17	611.885	58.4946	576.14	611.57	640.43	45
Variable:	RT10 (min/d)
	mean	sd	0.25	0.5	0.75	n
2016-11-16	608.03	64.358	573.775	594.55	645.625	20
2017-02-07	600.241	62.0932	575	602.3	631.3	17
2017-03-07	629.039	61.1071	584.5	630.9	663.6	57
2017-04-05	624.258	54.0411	586.1	621.9	655.6	59
2017-05-04	629.759	56.4607	589.425	640.8	672.95	58
2017-05-31	604.893	54.752	571	609	643.7	57
2017-06-30	606.681	65.2134	579.175	610.15	642.35	52
2017-07-31	631.308	56.5015	605.45	634.8	659.6	51
2017-09-19	622.486	53.0942	594.05	623.7	659.225	50
2017-10-17	601.625	62.8743	574.35	611.2	642.45	47
2017-11-17	614.869	59.489	580	613.4	639.3	45
Variable:	Milk yield (kg/d)
	mean	sd	0.25	0.5	0.75	n
2016-11-16	34.315	7.11146	30.475	34.45	37.85	20
2017-02-07	37.7824	10.0975	31.1	35.2	43.8	17
2017-03-07	37.6684	9.59208	31.2	36.6	43.4	57
2017-04-05	37.9881	7.59197	32.6	37.6	42.2	59
2017-05-04	37.1603	10.4216	31	35.65	43.675	58
2017-05-31	37.0772	8.45372	31.8	37.2	42.6	57
2017-06-30	35.1192	8.22424	30.4	34.65	39.625	52
2017-07-31	37.0628	9.83158	30.65	36	42.9	51
2017-09-19	35.308	8.9625	30.025	33	41.775	50
2017-10-17	33.8787	9.94828	25.75	34.1	40.85	47
2017-11-17	35.2578	10.8836	25.3	36.2	41.4	45
Variable:	Protein (kg/d)
	mean	sd	0.25	0.5	0.75	n
2016-11-16	1.27389	0.198693	1.19776	1.30672	1.39006	20
2017-02-07	1.26493	0.244447	1.18241	1.28205	1.39978	17
2017-03-07	1.28079	0.232818	1.10716	1.30464	1.43754	57
2017-04-05	1.29031	0.194576	1.17123	1.30471	1.40356	59
2017-05-04	1.23011	0.277009	1.0799	1.21588	1.40502	58
2017-05-31	1.28493	0.233259	1.122	1.28845	1.46927	57
2017-06-30	1.14958	0.22411	1.03874	1.17605	1.29465	52
2017-07-31	1.24225	0.24518	1.06678	1.23424	1.43868	51
2017-09-19	1.17254	0.228254	1.01595	1.17251	1.29099	50
2017-10-17	1.16244	0.326681	0.931865	1.18678	1.40267	47
2017-11-17	1.17251	0.37383	0.9453	1.22356	1.38474	45
Variable:	Casein (kg/d)
	mean	sd	0.25	0.5	0.75	n
2016-11-16	0.980556	0.157012	0.926355	1.00053	1.08058	20
2017-02-07	0.959349	0.176828	0.91296	0.98806	1.08564	17
2017-03-07	0.999164	0.181126	0.86136	1.01727	1.13025	57
2017-04-05	0.99174	0.151485	0.90626	1.00804	1.08199	59
2017-05-04	0.960987	0.216785	0.84445	0.95235	1.10154	58
2017-05-31	0.989652	0.180889	0.871	0.99755	1.13152	57
2017-06-30	0.907838	0.179119	0.823935	0.92785	1.02808	52
2017-07-31	0.956911	0.188829	0.8253	0.95608	1.112	51
2017-09-19	0.918772	0.184726	0.794955	0.92362	1.0229	50
2017-10-17	0.893957	0.25269	0.70704	0.90567	1.0776	47
2017-11-17	0.913374	0.289889	0.74513	0.95634	1.09368	45
Variable:	Fat (kg/d)
	mean	sd	0.25	0.5	0.75	n
2016-11-16	1.6707	0.431567	1.37302	1.65556	1.8497	20
2017-02-07	1.56488	0.360857	1.36864	1.55472	1.8095	17
2017-03-07	1.43751	0.34921	1.20332	1.38288	1.61964	57
2017-04-05	1.81542	0.581764	1.43458	1.79574	2.0771	59
2017-05-04	1.59765	0.506894	1.27022	1.49616	1.92955	58
2017-05-31	1.45163	0.337836	1.24338	1.44352	1.66116	57
2017-06-30	1.31563	0.289269	1.12893	1.34563	1.48198	52
2017-07-31	1.38362	0.30595	1.17569	1.36408	1.59104	51
2017-09-19	1.18599	0.439516	0.952627	1.19435	1.42828	50
2017-10-17	1.46817	0.571619	1.14488	1.3423	1.65091	47
2017-11-17	1.26743	0.472386	1.062	1.28936	1.4787	45
Variable:	Lactose (kg/d)
	mean	sd	0.25	0.5	0.75	n
2016-11-16	1.61723	0.398862	1.38035	1.57227	1.8056	20
2017-02-07	1.78594	0.455385	1.4471	1.62846	1.98628	17
2017-03-07	1.82235	0.473242	1.5312	1.84023	2.11358	57
2017-04-05	1.83835	0.380155	1.57265	1.85861	2.09156	59
2017-05-04	1.7899	0.505591	1.50395	1.77316	2.17403	58
2017-05-31	1.80471	0.415801	1.52133	1.8326	2.08788	57
2017-06-30	1.7004	0.413522	1.46622	1.71365	1.96158	52
2017-07-31	1.79889	0.473082	1.49955	1.74906	2.13264	51
2017-09-19	1.66308	0.446316	1.35871	1.58425	1.95112	50
2017-10-17	1.57705	0.565129	1.15572	1.60686	1.97994	47
2017-11-17	1.63221	0.614474	1.18151	1.68608	2.015	45
Variable:	Protein (%)
	mean	sd	0.25	0.5	0.75	n
2016-11-16	3.77	0.454926	3.4725	3.675	4.02	20
2017-02-07	3.42588	0.512104	3.06	3.33	3.83	17
2017-03-07	3.47368	0.372087	3.25	3.46	3.74	57
2017-04-05	3.43949	0.341621	3.285	3.42	3.61	59
2017-05-04	3.37828	0.340155	3.1625	3.395	3.5925	58
2017-05-31	3.50912	0.296457	3.3	3.57	3.69	57
2017-06-30	3.30923	0.300854	3.1	3.335	3.485	52
2017-07-31	3.42314	0.3665	3.2	3.4	3.64	51
2017-09-19	3.3828	0.391163	3.105	3.31	3.625	50
2017-10-17	3.51021	0.654421	3.29	3.49	3.84	47
2017-11-17	3.33511	0.830511	3.26	3.38	3.69	45
Variable:	Casein (%)
	mean	sd	0.25	0.5	0.75	n
2016-11-16	2.9035	0.387071	2.665	2.85	3.1325	20
2017-02-07	2.60882	0.439472	2.28	2.54	2.88	17
2017-03-07	2.71	0.293349	2.53	2.7	2.91	57
2017-04-05	2.64559	0.290667	2.5	2.64	2.775	59
2017-05-04	2.63879	0.271811	2.48	2.635	2.82	58
2017-05-31	2.70404	0.254213	2.55	2.76	2.84	57
2017-06-30	2.61404	0.279932	2.4175	2.635	2.7725	52
2017-07-31	2.63726	0.286608	2.435	2.63	2.815	51
2017-09-19	2.6468	0.303533	2.4375	2.59	2.865	50
2017-10-17	2.70128	0.51782	2.485	2.71	2.975	47
2017-11-17	2.59978	0.653722	2.49	2.64	2.84	45
Variable:	Fat (%)
	mean	sd	0.25	0.5	0.75	n
2016-11-16	4.949	1.27311	4.1525	4.74	5.28	20
2017-02-07	4.25059	0.924233	3.5	3.96	4.51	17
2017-03-07	3.87649	0.595209	3.46	3.89	4.18	57
2017-04-05	4.75695	1.10425	4.005	4.71	5.055	59
2017-05-04	4.31879	0.661651	3.865	4.29	4.7775	58
2017-05-31	3.94193	0.53878	3.51	3.91	4.31	57
2017-06-30	3.79673	0.567405	3.4475	3.705	4.18	52
2017-07-31	3.83372	0.686026	3.44	3.81	4.18	51
2017-09-19	3.4686	1.1024	3.0275	3.58	4.1275	50
2017-10-17	4.47468	1.58327	3.73	4.22	5.07	47
2017-11-17	3.62244	1.13292	3.1	3.57	4.42	45
Variable:	Lactose (%)
	mean	sd	0.25	0.5	0.75	n
2016-11-16	4.68	0.350353	4.5525	4.79	4.935	20
2017-02-07	4.75176	0.285618	4.59	4.85	4.94	17
2017-03-07	4.82825	0.216029	4.72	4.85	4.95	57
2017-04-05	4.83576	0.26427	4.745	4.89	4.965	59
2017-05-04	4.81017	0.216256	4.665	4.83	4.9575	58
2017-05-31	4.86158	0.226879	4.72	4.85	5.05	57
2017-06-30	4.82731	0.320313	4.695	4.88	5.0325	52
2017-07-31	4.86137	0.194649	4.715	4.88	5.01	51
2017-09-19	4.6996	0.253868	4.5625	4.74	4.8775	50
2017-10-17	4.63021	0.7468	4.52	4.78	4.925	47
2017-11-17	4.51889	1.00795	4.61	4.74	4.87	45

## Sheet: farm3
Variable:	DIM (at the TD)
	mean	sd	0.25	0.5	0.75	n
2016-11-03	112.692	72.8953	72	106	151	13
2016-12-03	147.246	95.2046	62	138	207	69
2017-01-26	152.695	96.1541	74.75	146	220.25	236
2017-02-24	157.088	97.4492	69.25	151	224.75	250
2017-03-23	168.027	102.354	78.5	160	242.25	260
2017-05-23	178.674	109.449	93.5	167	259	267
2017-06-21	177.229	111.089	84	165	258	275
2017-07-17	172.294	114.607	69.5	163	253	279
2017-09-05	172.278	112.568	78	163	245	273
2017-11-16	174.642	109.239	89	163	253	265
Variable:	RT3 (min/d)
	mean	sd	0.25	0.5	0.75	n
2016-11-03	497.385	64.6729	439.67	489.33	527	13
2016-12-03	483.183	72.5355	441	499	526	69
2017-01-26	499.78	68.0131	466.335	507.33	542	236
2017-02-24	502.399	68.4859	473	505.165	548.247	250
2017-03-23	498.531	69.886	462.832	504.165	544.497	260
2017-05-23	498.619	73.8674	453.33	498.33	551.665	267
2017-06-21	481.161	84.7723	427.835	487.67	538.5	275
2017-07-17	504.528	78.9763	452.165	514	557.835	279
2017-09-05	486.056	79.6834	445.33	497.33	532.67	273
2017-11-16	466.199	82.7324	420	473.67	519.67	265
Variable:	RT7 (min/d)
	mean	sd	0.25	0.5	0.75	n
2016-11-03	495.703	67.2096	448.29	484.71	530.57	13
2016-12-03	476.149	64.8982	436	483.86	515.57	69
2017-01-26	501.991	63.8078	469.538	509.43	544.072	236
2017-02-24	504.734	64.0579	470.605	513.075	550.997	250
2017-03-23	494.022	67.6085	458.57	499.5	542.712	260
2017-05-23	494.913	72.2885	452.715	502.29	545.64	267
2017-06-21	478.821	78.4706	429.43	485.71	531.355	275
2017-07-17	493.297	78.4119	438.285	497.57	553.925	279
2017-09-05	492.762	75.0914	453.86	498	544.14	273
2017-11-16	466.574	75.928	427.43	474.29	515.71	265
Variable:	RT10 (min/d)
	mean	sd	0.25	0.5	0.75	n
2016-11-03	464.9	74.8758	414.7	446.4	485	13
2016-12-03	471.996	68.2935	429	478.6	513.4	69
2017-01-26	498.33	63.7719	462.025	505.85	540.825	236
2017-02-24	502.466	62.8695	466.075	511.05	548.625	250
2017-03-23	493.598	67.266	460.15	501.05	541.25	260
2017-05-23	497.285	69.499	454.85	499	545.05	267
2017-06-21	484.024	75.5697	437.55	490.2	537.1	275
2017-07-17	490.506	76.7619	435.8	491.8	551.35	279
2017-09-05	491.704	75.5933	450.7	499	540.8	273
2017-11-16	463.125	73.1918	424.2	471.1	506.9	265
Variable:	Milk yield (kg/d)
	mean	sd	0.25	0.5	0.75	n
2016-11-03	40.7615	11.8704	33.2	39.7	43.9	13
2016-12-03	35.4058	11.4649	26.4	34.3	41.6	69
2017-01-26	37.0873	9.78156	30	35.85	44.425	236
2017-02-24	36.7956	11.405	28	35.45	45.2	250
2017-03-23	37.6946	11.0402	28.5	36.05	46.2	260
2017-05-23	35.3764	9.82684	28.5	34.8	41.4	267
2017-06-21	35.1454	10.094	28.55	34.6	41.6	275
2017-07-17	33.2652	9.56062	26.75	32.8	38.85	279
2017-09-05	34.17	8.35712	29.4	33.9	39.3	273
2017-11-16	33.4823	9.10209	26.9	33.6	39.5	265
Variable:	Protein (kg/d)
	mean	sd	0.25	0.5	0.75	n
2016-11-03	1.3661	0.303448	1.16494	1.30944	1.48382	13
2016-12-03	1.25725	0.345573	1.00096	1.24916	1.46625	69
2017-01-26	1.30844	0.277699	1.11262	1.3104	1.50984	236
2017-02-24	1.26862	0.327701	1.02319	1.23914	1.52192	250
2017-03-23	1.3039	0.307883	1.06799	1.28442	1.52393	260
2017-05-23	1.2149	0.27489	1.01074	1.1966	1.40061	267
2017-06-21	1.17888	0.299575	0.973035	1.18374	1.36563	275
2017-07-17	1.11694	0.272803	0.92482	1.10664	1.30344	279
2017-09-05	1.16063	0.248477	1.01661	1.16844	1.30707	273
2017-11-16	1.21893	0.298427	1.0098	1.22348	1.41729	265
Variable:	Casein (kg/d)
	mean	sd	0.25	0.5	0.75	n
2016-11-03	1.06117	0.23414	0.90432	1.02672	1.14579	13
2016-12-03	0.973601	0.271394	0.78592	0.9724	1.14563	69
2017-01-26	1.01945	0.218108	0.868025	1.02012	1.17292	236
2017-02-24	0.983994	0.253516	0.79517	0.963355	1.17631	250
2017-03-23	1.02125	0.240801	0.8393	0.99883	1.1961	260
2017-05-23	0.947888	0.211993	0.78831	0.93808	1.09573	267
2017-06-21	0.923307	0.225761	0.761985	0.93012	1.0722	275
2017-07-17	0.88083	0.215128	0.72842	0.8745	1.0256	279
2017-09-05	0.91308	0.195912	0.7991	0.91956	1.02746	273
2017-11-16	0.951046	0.233783	0.79128	0.95718	1.104	265
Variable:	Fat (kg/d)
	mean	sd	0.25	0.5	0.75	n
2016-11-03	1.55465	0.496371	1.1775	1.45935	1.854	13
2016-12-03	1.24107	0.378617	0.96968	1.24547	1.4801	69
2017-01-26	1.80255	0.643126	1.34424	1.61702	2.20942	236
2017-02-24	1.52745	0.511833	1.16735	1.44307	1.84354	250
2017-03-23	1.68172	0.482475	1.31413	1.60407	2.00372	260
2017-05-23	1.63548	0.469155	1.33144	1.57798	1.92976	267
2017-06-21	1.22404	0.424612	0.977475	1.18944	1.41588	275
2017-07-17	1.42128	0.502021	1.12029	1.33318	1.63207	279
2017-09-05	1.16377	0.30479	0.92856	1.18164	1.34365	273
2017-11-16	1.19238	0.468796	0.89948	1.12992	1.3772	265
Variable:	Lactose (kg/d)
	mean	sd	0.25	0.5	0.75	n
2016-11-03	2.01289	0.587511	1.58316	2.03661	2.22075	13
2016-12-03	1.71147	0.597512	1.29978	1.62274	2.07168	69
2017-01-26	1.80679	0.494003	1.47553	1.74172	2.14968	236
2017-02-24	1.78534	0.575681	1.34678	1.70918	2.22819	250
2017-03-23	1.84951	0.556102	1.42086	1.79428	2.26483	260
2017-05-23	1.73386	0.493165	1.36416	1.70578	2.04765	267
2017-06-21	1.73113	0.507648	1.39714	1.68502	2.04126	275
2017-07-17	1.63395	0.473469	1.31404	1.6219	1.90466	279
2017-09-05	1.66429	0.41982	1.39576	1.666	1.91878	273
2017-11-16	1.62536	0.457205	1.305	1.64256	1.93158	265
Variable:	Protein (%)
	mean	sd	0.25	0.5	0.75	n
2016-11-03	3.41923	0.326993	3.19	3.43	3.57	13
2016-12-03	3.62551	0.444273	3.31	3.58	3.91	69
2017-01-26	3.59818	0.42397	3.29	3.595	3.8525	236
2017-02-24	3.52112	0.414903	3.22	3.5	3.7575	250
2017-03-23	3.53135	0.391778	3.22	3.53	3.7725	260
2017-05-23	3.50258	0.391353	3.25	3.47	3.75	267
2017-06-21	3.41098	0.399895	3.18	3.4	3.625	275
2017-07-17	3.41828	0.378258	3.15	3.39	3.675	279
2017-09-05	3.43663	0.342251	3.19	3.43	3.7	273
2017-11-16	3.6923	0.413251	3.42	3.67	3.97	265
Variable:	Casein (%)
	mean	sd	0.25	0.5	0.75	n
2016-11-03	2.66077	0.285349	2.46	2.68	2.8	13
2016-12-03	2.80391	0.3564	2.56	2.78	3.01	69
2017-01-26	2.80259	0.332207	2.55	2.8	2.9925	236
2017-02-24	2.73156	0.326038	2.5	2.72	2.91	250
2017-03-23	2.76677	0.317932	2.5175	2.765	2.9425	260
2017-05-23	2.73768	0.333119	2.53	2.72	2.93	267
2017-06-21	2.67346	0.292532	2.47	2.66	2.845	275
2017-07-17	2.6991	0.326484	2.46	2.68	2.915	279
2017-09-05	2.70447	0.281515	2.52	2.7	2.91	273
2017-11-16	2.88207	0.340401	2.67	2.85	3.13	265
Variable:	Fat (%)
	mean	sd	0.25	0.5	0.75	n
2016-11-03	3.86769	0.743126	3.45	3.93	4.17	13
2016-12-03	3.67913	1.31788	3.08	3.57	4.14	69
2017-01-26	4.86089	1.06157	4.1875	4.76	5.43	236
2017-02-24	4.25256	1.00786	3.645	4.275	4.8175	250
2017-03-23	4.55292	0.850329	4.0075	4.49	5.1725	260
2017-05-23	4.72311	0.973421	4.05	4.67	5.315	267
2017-06-21	3.58887	1.05549	3.025	3.51	4.08	275
2017-07-17	4.32491	0.987255	3.785	4.23	4.83	279
2017-09-05	3.48612	0.809454	2.89	3.54	3.95	273
2017-11-16	3.64857	1.13592	2.93	3.65	4.28	265
Variable:	Lactose (%)
	mean	sd	0.25	0.5	0.75	n
2016-11-03	4.94	0.20347	4.78	4.97	5.1	13
2016-12-03	4.77986	0.334969	4.69	4.88	4.98	69
2017-01-26	4.86102	0.233331	4.77	4.9	5.0125	236
2017-02-24	4.8352	0.234033	4.7425	4.87	4.99	250
2017-03-23	4.89396	0.204877	4.79	4.91	5.0425	260
2017-05-23	4.89423	0.191246	4.78	4.92	5.03	267
2017-06-21	4.92047	0.190922	4.8	4.94	5.055	275
2017-07-17	4.90979	0.211139	4.78	4.95	5.06	279
2017-09-05	4.86168	0.210389	4.75	4.9	5.01	273
2017-11-16	4.84238	0.228639	4.72	4.89	5	265
